# Supplementary material for: The northernmost record of a blood-sucking ectoparasite, Lipoptena fortisetosa Maa (Diptera: Hippoboscidae), in Estonia
Source: Biodivers Data J. 2019 Dec 13;7:e47857. doi: 10.3897/BDJ.7.e47857 (PMC6925061; doi:10.3897/BDJ.7.e47857)
Supplement: Supplementary material 1 — Full list with details of studied Lipoptena fortisetosa and L. cervi specimens. GenBank codes are provided for sequenced specimens. Abbreviations: m = males, f = females [file bdj-07-e47857-s001.xls]

## Sheet: Sheet1
Table S1. Full list with details of studied Lipoptena fortisetosa and L. cervi specimens. GenBank codes are provided for sequenced specimens. Abbreviations: m=males, f=females.
Species	Country	County	Municipality	Locality	Latitude	Longitude	Date	Collector	Collecting method	Preservation method	No of specimens	Collection code	GenBank accession code	Locality indication on Fig. 1
Lipoptena fortisetosa Maa, 1965	Estonia	Tartu	Tartu city	Tiksoja	58.4147	26.6380	2019-07-21	T. Kesküla	captured while attacking humans	in ethyl alcohol	1m	IZBE0270001		a
Lipoptena fortisetosa Maa, 1965	Estonia	Tartu	Tartu city	Raudtee street	58.3477	26.6936	2017-08-07	T. Kesküla	sweepnet	in ethyl alcohol	1f	IZBE0270002		b
Lipoptena fortisetosa Maa, 1965	Estonia	Tartu	Tartu city	Raudtee street	58.3477	26.6936	2017-08-28	T. Kesküla	sweepnet	pinned	1m	IZBE0270003		b
Lipoptena fortisetosa Maa, 1965	Estonia	Tartu	Kambja	Variku forest	58.3425	26.6805	2019-07-04	T. Kesküla	captured while attacking humans	in ethyl alcohol	1m	IZBE0270004		c
Lipoptena fortisetosa Maa, 1965	Estonia	Tartu	Kambja	Variku forest	58.3425	26.6805	2019-07-04	T. Kesküla	captured while attacking humans	in ethyl alcohol	1f	IZBE0270005		c
Lipoptena fortisetosa Maa, 1965	Estonia	Tartu	Kambja	Variku forest	58.3425	26.6805	2019-07-04	T. Kesküla	captured while attacking humans	in ethyl alcohol	1m	IZBE0270006	MN807847	c
Lipoptena fortisetosa Maa, 1965	Estonia	Tartu	Kastre	Haaslava	58.3329	26.8326	2019-07-31	M. Kruus	captured while attacking humans	in ethyl alcohol	1m	IZBE0270007		d
Lipoptena fortisetosa Maa, 1965	Estonia	Tartu	Nõo	Meeri	58.2736	26.4588	2016-07-15	H. Õunap	captured while attacking humans	pinned	1m	PICHO07705		e
Lipoptena fortisetosa Maa, 1965	Estonia	Tartu	Nõo	Meeri	58.2736	26.4588	2019-07-17	H. Õunap	captured while attacking humans	pinned	1m	PICHO07706		e
Lipoptena fortisetosa Maa, 1965	Estonia	Tartu	Nõo	Peedu	58.2060	26.4303	2019-07-13	K. Sammet	captured while attacking humans	in ethyl alcohol	1m	IZBE0270008		f
Lipoptena fortisetosa Maa, 1965	Estonia	Tartu	Kastre	Ignase	58.2499	26.8342	2019-07-23	M. Kruus	captured while attacking humans	in ethyl alcohol	1m	IZBE0270009		g
Lipoptena fortisetosa Maa, 1965	Estonia	Tartu	Kastre	Ignase	58.2499	26.8342	2019-07-23	M. Kruus	captured while attacking humans	in ethyl alcohol	1f	IZBE0270010		g
Lipoptena fortisetosa Maa, 1965	Estonia	Tartu	Kastre	Ignase	58.2499	26.8342	2019-07-23	M. Kruus	captured while attacking humans	in ethyl alcohol	1f	IZBE0270011		g
Lipoptena fortisetosa Maa, 1965	Estonia	Tartu	Kastre	Ignase	58.2499	26.8342	2019-07-23	M. Kruus	captured while attacking humans	in ethyl alcohol	1f	IZBE0270012		g
Lipoptena fortisetosa Maa, 1965	Estonia	Tartu	Kambja	Vana-Kuuste	58.2680	26.7866	2015-07-28	H. Õunap	captured while attacking humans	pinned	1m	PICHO07703		h
Lipoptena fortisetosa Maa, 1965	Estonia	Tartu	Kambja	Kambja, 3 km NO	58.2513	26.7555	2016-07-30	H. Õunap	captured while attacking humans	pinned	1f	PICHO07707		i
Lipoptena fortisetosa Maa, 1965	Estonia	Tartu	Kastre	Järvselja	58.2651	27.3165	2019-06-27	K. Filippova	captured while attacking humans	in ethyl alcohol	1f	IZBE0270013	MN807844	j
Lipoptena fortisetosa Maa, 1965	Estonia	Põlva	Põlva	Mooste	58.1679	27.1423	2019-07-18	L-M. Kurina	captured while attacking humans	in ethyl alcohol	1m	IZBE0270014		k
Lipoptena fortisetosa Maa, 1965	Estonia	Põlva	Põlva	Mooste	58.1679	27.1423	2019-07-18	L-M. Kurina	captured while attacking humans	in ethyl alcohol	1m	IZBE0270015	MN807843	k
Lipoptena fortisetosa Maa, 1965	Estonia	Põlva	Põlva	Karilatsi	58.1293	26.9031	2019-07-15	T. Tammaru	captured while attacking humans	in ethyl alcohol	1m	IZBE0270016		l
Lipoptena fortisetosa Maa, 1965	Estonia	Põlva	Põlva	Karilatsi	58.1293	26.9031	2019-07-15	T. Tammaru	captured while attacking humans	in ethyl alcohol	1f	IZBE0270017		l
Lipoptena fortisetosa Maa, 1965	Estonia	Põlva	Räpina	In bog close to Meelva lake	58.1200	27.3708	2014-09-27	E. Kaur	captured while attacking humans	pinned	1m	PICHO07702	MN807849	m
Lipoptena fortisetosa Maa, 1965	Estonia	Valga	Otepää	Pühajärve	58.0443	26.4551	2019-06-12	M. Brodski	captured while attacking humans	pinned	1f	TUZ275550		n
Lipoptena fortisetosa Maa, 1965	Estonia	Valga	Otepää	Purtsi	58.0580	26.1155	2016-07-15	H. Õunap	captured while attacking humans	pinned	1m	PICHO07704		o
Lipoptena fortisetosa Maa, 1965	Estonia	Viljandi	Mulgi	Lilli	57.9744	25.5562	2019-07-07	H. Kirik	captured while attacking humans	in ethyl alcohol	1f	IZBE0270018	MN807845	p
Lipoptena fortisetosa Maa, 1965	Estonia	Põlva	Kanepi	South from lake Uiakatsi	57.9481	26.6250	2019-07-16	J. Ruusmaa	captured while attacking humans	in ethyl alcohol	1f	IZBE0270019		q
Lipoptena fortisetosa Maa, 1965	Estonia	Valga	Otepää	Lossiküla	57.9025	26.2747	2014-06-28	E. Kaur	captured while attacking humans	pinned	1f	PICHO07701		r
Lipoptena fortisetosa Maa, 1965	Estonia	Valga	Valga	Lüllemäe	57.7514	26.3765	2019-07-15	L-M. Kurina	captured while attacking humans	in ethyl alcohol	1f	IZBE0270020		s
Lipoptena fortisetosa Maa, 1965	Estonia	Valga	Valga	Lüllemäe	57.7514	26.3765	2019-07-15	L-M. Kurina	captured while attacking humans	in ethyl alcohol	1f	IZBE0270021	MN807846	s
Lipoptena fortisetosa Maa, 1965	Estonia	Võru	Võru	Piusa	57.8400	27.4702	2019-07-13	E. Õunap	captured while attacking humans	pinned	1m	IZBE0270022	MN807848	t
Lipoptena fortisetosa Maa, 1965	Estonia	Võru	Võru	Piusa	57.8400	27.4702	2019-07-13	E. Õunap	captured while attacking humans	pinned	1f	IZBE0270023		t
Lipoptena fortisetosa Maa, 1965	Estonia	Võru	Võru	Vana-Vastseliina	57.7338	27.3572	2019-07-15	E. Õunap	captured while attacking humans	pinned	1f	IZBE0270024		u
Lipoptena fortisetosa Maa, 1965	Estonia	Võru	Võru	Vana-Vastseliina	57.7338	27.3572	2019-07-15	E. Õunap	captured while attacking humans	pinned	1f	IZBE0270025		u
Lipoptena fortisetosa Maa, 1965	Estonia	Võru	Võru	Vana-Vastseliina	57.7405	27.3563	2019-07-28	E. Õunap	captured while attacking humans	in ethyl alcohol	1f	IZBE0270026		u
Lipoptena fortisetosa Maa, 1965	Estonia	Võru	Võru	Vana-Vastseliina	57.7405	27.3563	2019-07-28	E. Õunap	captured while attacking humans	in ethyl alcohol	1f	IZBE0270027		u
Lipoptena cervi (Linnaeus, 1758)	Estonia	Saare	Saaremaa	Austla	58.2691	21.8591	2019-09-09	E. Õunap	captured while attacking humans	in ethyl alcohol	1f	IZBE0270028
Lipoptena cervi (Linnaeus, 1758)	Estonia	Saare	Saaremaa	Austla	58.2691	21.8591	2019-09-09	E. Õunap	captured while attacking humans	in ethyl alcohol	1m	IZBE0270029	MN807842
Lipoptena cervi (Linnaeus, 1758)	Estonia	Pärnu	Pärnu city	Kärbu	58.4341	24.2367	2019-08-17	O. Kurina	captured while attacking humans	in ethyl alcohol	1m	IZBE0270030
Lipoptena cervi (Linnaeus, 1758)	Estonia	Pärnu	Pärnu city	Kärbu	58.4341	24.2367	2019-08-17	O. Kurina	captured while attacking humans	in ethyl alcohol	1m	IZBE0270031
Lipoptena cervi (Linnaeus, 1758)	Estonia	Pärnu	Pärnu city	Kärbu	58.4341	24.2367	2019-08-17	O. Kurina	captured while attacking humans	in ethyl alcohol	1f	IZBE0270032
Lipoptena cervi (Linnaeus, 1758)	Estonia	Pärnu	Saarde	N of Tuuliku; Ruunasoo west edge	58.0113	24.7415	2019-09-07	K. Kübar	captured while attacking humans	in ethyl alcohol	1m	IZBE0270033
Lipoptena cervi (Linnaeus, 1758)	Estonia	Pärnu	Saarde	N of Tuuliku; Ruunasoo west edge	58.0113	24.7415	2019-09-07	K. Kübar	captured while attacking humans	in ethyl alcohol	1f	IZBE0270034
Lipoptena cervi (Linnaeus, 1758)	Estonia	Pärnu	Saarde	Kodaja bog	58.0100	24.7855	2019-09-14	K. Kübar	captured while attacking humans	in ethyl alcohol	1m	IZBE0270035
Lipoptena cervi (Linnaeus, 1758)	Estonia	Pärnu	Saarde	Kodaja bog	58.0100	24.7855	2019-09-14	K. Kübar	captured while attacking humans	in ethyl alcohol	1m	IZBE0270036
Lipoptena cervi (Linnaeus, 1758)	Estonia	Pärnu	Saarde	Kodaja bog	58.0100	24.7855	2019-09-14	K. Kübar	captured while attacking humans	in ethyl alcohol	1m	IZBE0270037
Lipoptena cervi (Linnaeus, 1758)	Estonia	Pärnu	Saarde	Kodaja bog	58.0100	24.7855	2019-09-14	K. Kübar	captured while attacking humans	in ethyl alcohol	1f	IZBE0270038
Lipoptena cervi (Linnaeus, 1758)	Estonia	Pärnu	Saarde	Kodaja bog	58.0100	24.7855	2019-09-14	K. Kübar	captured while attacking humans	in ethyl alcohol	1f	IZBE0270039
Lipoptena cervi (Linnaeus, 1758)	Estonia	Pärnu	Saarde	Kodaja bog	58.0100	24.7855	2019-09-14	K. Kübar	captured while attacking humans	in ethyl alcohol	1f	IZBE0270040
Lipoptena cervi (Linnaeus, 1758)	Estonia	Pärnu	Saarde	Kodaja bog	58.0100	24.7855	2019-09-14	K. Kübar	captured while attacking humans	in ethyl alcohol	1f	IZBE0270041
Lipoptena cervi (Linnaeus, 1758)	Estonia	Pärnu	Saarde	Kodaja bog	58.0100	24.7855	2019-09-14	K. Kübar	captured while attacking humans	in ethyl alcohol	1m	IZBE0270042	MN807837
Lipoptena cervi (Linnaeus, 1758)	Estonia	Harju	Lääne-Harju	Läänemaa Suursoo, Hatu	59.1725	23.9508	2019-09-07	M. Kose	captured while attacking humans	in ethyl alcohol	1m	IZBE0270043
Lipoptena cervi (Linnaeus, 1758)	Estonia	Harju	Lääne-Harju	Läänemaa Suursoo, Hatu	59.1725	23.9508	2019-09-07	M. Kose	captured while attacking humans	in ethyl alcohol	1f	IZBE0270044
Lipoptena cervi (Linnaeus, 1758)	Estonia	Harju	Lääne-Harju	Läänemaa Suursoo, Hatu	59.1725	23.9508	2019-09-07	M. Kose	captured while attacking humans	in ethyl alcohol	1f	IZBE0270045
Lipoptena cervi (Linnaeus, 1758)	Estonia	Harju	Lääne-Harju	Läänemaa Suursoo, Hatu	59.1725	23.9508	2019-09-07	M. Kose	captured while attacking humans	in ethyl alcohol	1f	IZBE0270046
Lipoptena cervi (Linnaeus, 1758)	Estonia	Harju	Lääne-Harju	Läänemaa Suursoo, Hatu	59.1725	23.9508	2019-09-07	M. Kose	captured while attacking humans	in ethyl alcohol	1f	IZBE0270047	MN807839
Lipoptena cervi (Linnaeus, 1758)	Estonia	Harju	Anija	Aegviidu, Mustjõe	59.2829	25.5105	2019-09-11	R. Viidalepp	captured while attacking humans	in ethyl alcohol	1m	IZBE0270048
Lipoptena cervi (Linnaeus, 1758)	Estonia	Harju	Anija	Aegviidu, Mustjõe	59.2829	25.5105	2019-09-11	R. Viidalepp	captured while attacking humans	in ethyl alcohol	1m	IZBE0270049
Lipoptena cervi (Linnaeus, 1758)	Estonia	Harju	Anija	Aegviidu, Mustjõe	59.2829	25.5105	2019-09-11	R. Viidalepp	captured while attacking humans	in ethyl alcohol	1m	IZBE0270050
Lipoptena cervi (Linnaeus, 1758)	Estonia	Harju	Anija	Aegviidu, Mustjõe	59.2829	25.5105	2019-09-11	R. Viidalepp	captured while attacking humans	in ethyl alcohol	1f	IZBE0270051
Lipoptena cervi (Linnaeus, 1758)	Estonia	Harju	Anija	Aegviidu, Mustjõe	59.2829	25.5105	2019-09-11	R. Viidalepp	captured while attacking humans	in ethyl alcohol	1f	IZBE0270052
Lipoptena cervi (Linnaeus, 1758)	Estonia	Harju	Anija	Aegviidu, Mustjõe	59.2829	25.5105	2019-09-11	R. Viidalepp	captured while attacking humans	in ethyl alcohol	1f	IZBE0270053	MN807841
Lipoptena cervi (Linnaeus, 1758)	Estonia	Harju	Anija	Aegviidu, Mustjõe	59.2829	25.5105	2019-09-11	R. Viidalepp	captured while attacking humans	pinned	1m	IZBE0270054
Lipoptena cervi (Linnaeus, 1758)	Estonia	Harju	Anija	Aegviidu, Mustjõe	59.2829	25.5105	2019-09-11	R. Viidalepp	captured while attacking humans	pinned	1f	IZBE0270055
Lipoptena cervi (Linnaeus, 1758)	Estonia	Harju	Kuusalu	Haavakannu	59.4702	25.2772	2019-08-16	E. Õunap	captured while attacking humans	in ethyl alcohol	1m	IZBE0270056
Lipoptena cervi (Linnaeus, 1758)	Estonia	Harju	Kuusalu	Haavakannu	59.4702	25.2772	2019-08-16	E. Õunap	captured while attacking humans	in ethyl alcohol	1m	IZBE0270057
Lipoptena cervi (Linnaeus, 1758)	Estonia	Harju	Kuusalu	Haavakannu	59.4702	25.2772	2019-08-16	E. Õunap	captured while attacking humans	in ethyl alcohol	1f	IZBE0270058
Lipoptena cervi (Linnaeus, 1758)	Estonia	Lääne-Viru	Haljala	Lahemaa NP, Haili village	59.5711	26.1774	2019-09-08	T. Kull	captured while attacking humans	in ethyl alcohol	1m	IZBE0270059
Lipoptena cervi (Linnaeus, 1758)	Estonia	Lääne-Viru	Haljala	Lahemaa NP, Haili village	59.5711	26.1774	2019-09-08	T. Kull	captured while attacking humans	in ethyl alcohol	1m	IZBE0270060
Lipoptena cervi (Linnaeus, 1758)	Estonia	Lääne-Viru	Haljala	Lahemaa NP, Haili village	59.5711	26.1774	2019-09-08	T. Kull	captured while attacking humans	in ethyl alcohol	1f	IZBE0270061
Lipoptena cervi (Linnaeus, 1758)	Estonia	Lääne-Viru	Rakvere	Rakvere 5km--NW	59.3861	26.2329	2019-09-10	H. Pehlak	captured while attacking humans	in ethyl alcohol	1m	IZBE0270062	MN807838
Lipoptena cervi (Linnaeus, 1758)	Estonia	Jõgeva	Jõgeva	Selli	58.8983	26.2713	2019-09-10	H. Pehlak	captured while attacking humans	in ethyl alcohol	1m	IZBE0270063
Lipoptena cervi (Linnaeus, 1758)	Estonia	Jõgeva	Jõgeva	Selli	58.8983	26.2713	2019-09-10	H. Pehlak	captured while attacking humans	in ethyl alcohol	1m	IZBE0270064
Lipoptena cervi (Linnaeus, 1758)	Estonia	Jõgeva	Jõgeva	Selli	58.8983	26.2713	2019-09-10	H. Pehlak	captured while attacking humans	in ethyl alcohol	1f	IZBE0270065
Lipoptena cervi (Linnaeus, 1758)	Estonia	Tartu	Peipsiääre	Meoma	58.5543	27.0021	2019-09-17	O. Kurina	captured while attacking humans	in ethyl alcohol	1m	IZBE0270066
Lipoptena cervi (Linnaeus, 1758)	Estonia	Tartu	Peipsiääre	Meoma	58.5543	27.0021	2019-09-17	O. Kurina	captured while attacking humans	in ethyl alcohol	1m	IZBE0270067
Lipoptena cervi (Linnaeus, 1758)	Estonia	Tartu	Peipsiääre	Meoma	58.5543	27.0021	2019-09-17	O. Kurina	captured while attacking humans	in ethyl alcohol	1m	IZBE0270068
Lipoptena cervi (Linnaeus, 1758)	Estonia	Tartu	Peipsiääre	Meoma	58.5543	27.0021	2019-09-17	O. Kurina	captured while attacking humans	in ethyl alcohol	1f	IZBE0270069
Lipoptena cervi (Linnaeus, 1758)	Estonia	Tartu	Peipsiääre	Meoma	58.5543	27.0021	2019-09-17	O. Kurina	captured while attacking humans	in ethyl alcohol	1f	IZBE0270070
Lipoptena cervi (Linnaeus, 1758)	Estonia	Tartu	Peipsiääre	Meoma	58.5543	27.0021	2019-09-17	O. Kurina	captured while attacking humans	in ethyl alcohol	1f	IZBE0270071
Lipoptena cervi (Linnaeus, 1758)	Estonia	Tartu	Peipsiääre	Meoma	58.5543	27.0021	2019-09-17	O. Kurina	captured while attacking humans	in ethyl alcohol	1f	IZBE0270072	MN807836
Lipoptena cervi (Linnaeus, 1758)	Estonia	Tartu	Tartu	Pataste 3km--NE	58.597	26.7903	2019-09-01	O. Kurina	captured while attacking humans	in ethyl alcohol	1m	IZBE0270073
Lipoptena cervi (Linnaeus, 1758)	Estonia	Tartu	Tartu	Pataste 3km--NE	58.597	26.7903	2019-09-01	O. Kurina	captured while attacking humans	in ethyl alcohol	1m	IZBE0270074
Lipoptena cervi (Linnaeus, 1758)	Estonia	Tartu	Tartu	Pataste 3km--NE	58.597	26.7903	2019-09-01	O. Kurina	captured while attacking humans	in ethyl alcohol	1m	IZBE0270075
Lipoptena cervi (Linnaeus, 1758)	Estonia	Tartu	Tartu	Pataste 3km--NE	58.597	26.7903	2019-09-01	O. Kurina	captured while attacking humans	in ethyl alcohol	1f	IZBE0270076
Lipoptena cervi (Linnaeus, 1758)	Estonia	Tartu	Tartu	Pataste 3km--NE	58.597	26.7903	2019-09-01	O. Kurina	captured while attacking humans	in ethyl alcohol	1f	IZBE0270077
Lipoptena cervi (Linnaeus, 1758)	Estonia	Tartu	Tartu	Pataste 3km--NE	58.597	26.7903	2019-09-01	O. Kurina	captured while attacking humans	in ethyl alcohol	1f	IZBE0270078
Lipoptena cervi (Linnaeus, 1758)	Estonia	Tartu	Kastre	Ignase	58.2499	26.8342	2019-09-14	M. Kruus	captured while attacking humans	in ethyl alcohol	1m	IZBE0270079
Lipoptena cervi (Linnaeus, 1758)	Estonia	Tartu	Kastre	Ignase	58.2499	26.8342	2019-09-14	M. Kruus	captured while attacking humans	in ethyl alcohol	1m	IZBE0270080
Lipoptena cervi (Linnaeus, 1758)	Estonia	Tartu	Kastre	Ignase	58.2499	26.8342	2019-09-14	M. Kruus	captured while attacking humans	in ethyl alcohol	1f	IZBE0270081
Lipoptena cervi (Linnaeus, 1758)	Estonia	Tartu	Kastre	Ignase	58.2499	26.8342	2019-09-14	M. Kruus	captured while attacking humans	in ethyl alcohol	1f	IZBE0270082
Lipoptena cervi (Linnaeus, 1758)	Estonia	Tartu	Kastre	Ignase	58.2499	26.8342	2019-09-14	M. Kruus	captured while attacking humans	in ethyl alcohol	1f	IZBE0270083	MN807840
Lipoptena cervi (Linnaeus, 1758)	Estonia	Tartu	Kastre	Lääniste	58.2691	27.1655	2019-08-20	E. Õunap	captured while attacking humans	in ethyl alcohol	1m	IZBE0270084
Lipoptena cervi (Linnaeus, 1758)	Estonia	Tartu	Kastre	Lääniste	58.2691	27.1655	2019-08-20	E. Õunap	captured while attacking humans	in ethyl alcohol	1m	IZBE0270085
Lipoptena cervi (Linnaeus, 1758)	Estonia	Tartu	Kastre	Lääniste	58.2691	27.1655	2019-08-20	E. Õunap	captured while attacking humans	in ethyl alcohol	1m	IZBE0270086
